# Supplementary material
Source: PubMed Central journal article supplement (PMC4715764)

**Table S1: Single marker test results of the APOE region**

| Chr | Position   | rsname     | MAF   | F     | N  | $\beta$ | P        | P <sup>a</sup> |
|-----|------------|------------|-------|-------|----|---------|----------|----------------|
| 19  | 44,306,482 | rs11879355 | 0.393 | -     | 56 | -0.085  | 6.28E-03 | 2.21E-01       |
| 19  | 44,302,624 | rs349053   | 0.5   | 0.488 | 56 | -0.066  | 8.77E-03 | 4.33E-01       |
| 19  | 44,303,066 | rs11547806 | 0.438 | 0.415 | 56 | -0.068  | 1.06E-02 | 2.64E-01       |
| 19  | 45,998,247 | rs10401270 | 0.107 | 0.103 | 56 | 0.104   | 1.66E-02 | 6.51E-02       |
| 19  | 46,094,597 | rs3745820  | 0.277 | 0.266 | 56 | 0.069   | 1.76E-02 | 3.98E-02       |
| 19  | 45,818,835 | rs1133190  | 0.491 | 0.37  | 56 | 0.06    | 1.93E-02 | 8.88E-02       |
| 19  | 45,572,263 | -          | 0.143 | -     | 56 | -0.09   | 2.95E-02 | 2.28E-01       |
| 19  | 44,660,967 | rs12609635 | 0.357 | 0.368 | 56 | 0.064   | 4.06E-02 | 2.10E-01       |
| 19  | 45,322,744 | rs1135062  | 0.259 | 0.301 | 56 | -0.061  | 4.68E-02 | 2.63E-01       |
| 19  | 45,202,652 | rs3948201  | 0.089 | 0.032 | 56 | -0.104  | 4.76E-02 | 6.23E-01       |

MAF= Minor Allele Frequency in the sample; F= Minor allele frequency in the ESP project data of European-American sample; N= Sample size (#Subjects without missing genotypes);  $\beta$ = Effect size not adjusted for APOE; P= P-value not adjusted for APOE; P<sup>a</sup>= P-value adjusted for APOE.

**Table S2: Single marker test results of SNPs in genes discussed in Naj et al, 2014.**

| Chr           | snpname            | Pos (Bp)           | MAF          | $\beta$       | P*             | P <sup>§</sup> | rsname           |
|---------------|--------------------|--------------------|--------------|---------------|----------------|----------------|------------------|
| <i>CR1</i>    |                    |                    |              |               |                |                |                  |
| 1             | 1:207679307        | 207,679,307        | 0.205        | 0.004         | 9.0E-01        | -              |                  |
| <b>1</b>      | <b>1:207753621</b> | <b>207,753,621</b> | <b>0.232</b> | <b>0.071</b>  | <b>3.4E-02</b> | -              | <b>rs2274567</b> |
| 1             | 1:207760772        | 207,760,772        | 0.054        | -0.020        | 7.4E-01        | -              |                  |
| 1             | 1:207760773        | 207,760,773        | 0.313        | -0.036        | 2.7E-01        | -              |                  |
| 1             | 1:207782707        | 207,782,707        | 0.152        | 0.045         | 2.9E-01        | -              |                  |
| 1             | 1:207782931        | 207,782,931        | 0.241        | 0.047         | 1.6E-01        | -              |                  |
| <b>1</b>      | <b>1:207790088</b> | <b>207,790,088</b> | <b>0.232</b> | <b>0.071</b>  | <b>3.4E-02</b> | -              | <b>rs3811381</b> |
| 1             | 1:207795320        | 207,795,320        | 0.223        | 0.000         | 1.0E+00        | -              |                  |
| <i>BIN1</i>   |                    |                    |              |               |                |                |                  |
| 2             | 2:127811042        | 127,811,042        | 0.179        | -0.006        | 8.6E-01        | -              |                  |
| 2             | 2:127816632        | 127,816,632        | 0.25         | -0.023        | 4.2E-01        | -              |                  |
| 2             | 2:127816695        | 127,816,695        | 0.054        | -0.012        | 8.5E-01        | -              |                  |
| 2             | 2:127819777        | 127,819,777        | 0.179        | -0.006        | 8.6E-01        | -              |                  |
| 2             | 2:127821207        | 127,821,207        | 0.054        | -0.012        | 8.5E-01        | -              |                  |
| 2             | 2:127826533        | 127,826,533        | 0.304        | -0.012        | 6.6E-01        | -              |                  |
| <i>CD2AP</i>  |                    |                    |              |               |                |                |                  |
| -             | -                  | -                  | -            | -             | -              | -              |                  |
| <i>EPHA1</i>  |                    |                    |              |               |                |                |                  |
| 7             | 7:143088823        | 143,088,823        | 0.107        | -0.007        | 8.7E-01        | -              |                  |
| 7             | 7:143088867        | 143,088,867        | 0.107        | -0.007        | 8.7E-01        | -              |                  |
| 7             | 7:143092269        | 143,092,269        | 0.063        | 0.030         | 6.4E-01        | -              |                  |
| 7             | 7:143093538        | 143,093,538        | 0.196        | -0.004        | 9.2E-01        | -              |                  |
| 7             | 7:143097100        | 143,097,100        | 0.107        | 0.023         | 6.0E-01        | -              |                  |
| 7             | 7:143105830        | 143,105,830        | 0.353        | 0.018         | 6.6E-01        | -              |                  |
| <i>CLU</i>    |                    |                    |              |               |                |                |                  |
| 8             | 8:27462481         | 27,462,481         | 0.321        | -0.048        | 7.8E-02        | -              |                  |
| <i>MS4A4A</i> |                    |                    |              |               |                |                |                  |
| 11            | 11:60059810        | 60,059,810         | 0.107        | 0.064         | 1.4E-01        | -              |                  |
| 11            | 11:60070176        | 60,070,176         | 0.33         | 0.007         | 8.4E-01        | -              |                  |
| <i>PICALM</i> |                    |                    |              |               |                |                |                  |
| 11            | 11:85692181        | 85,692,181         | 0.411        | 0.020         | 5.3E-01        | -              |                  |
| 11            | 11:85718641        | 85,718,641         | 0.143        | 0.043         | 2.4E-01        | -              |                  |
| 11            | 11:85725937        | 85,725,937         | 0.161        | 0.044         | 2.4E-01        | -              |                  |
| <i>ABCA7</i>  |                    |                    |              |               |                |                |                  |
| <b>19</b>     | <b>19:1042809</b>  | <b>1,042,809</b>   | <b>0.42</b>  | <b>0.060</b>  | <b>1.8E-02</b> | -              | <b>rs3764645</b> |
| <b>19</b>     | <b>19:1047002</b>  | <b>1,047,002</b>   | <b>0.446</b> | <b>-0.058</b> | <b>2.3E-02</b> | -              | <b>rs3752234</b> |
| 19            | 19:1047161         | 1,047,161          | 0.357        | -0.037        | 1.8E-01        | -              |                  |
| 19            | 19:1047537         | 1,047,537          | 0.054        | 0.016         | 7.9E-01        | -              |                  |
| 19            | 19:1049269         | 1,049,269          | 0.188        | -0.059        | 1.3E-01        | -              |                  |
| 19            | 19:1049305         | 1,049,305          | 0.161        | 0.059         | 1.3E-01        | -              |                  |

|             |             |            |       |        |         |         |
|-------------|-------------|------------|-------|--------|---------|---------|
| 19          | 19:1051214  | 1,051,214  | 0.321 | 0.044  | 1.1E-01 | -       |
| 19          | 19:1052005  | 1,052,005  | 0.455 | -0.024 | 3.7E-01 | -       |
| 19          | 19:1053524  | 1,053,524  | 0.125 | 0.010  | 8.0E-01 | -       |
| 19          | 19:1054060  | 1,054,060  | 0.446 | -0.024 | 3.7E-01 | -       |
| 19          | 19:1055191  | 1,055,191  | 0.446 | -0.024 | 3.7E-01 | -       |
| 19          | 19:1056065  | 1,056,065  | 0.446 | -0.024 | 3.7E-01 | -       |
| 19          | 19:1056492  | 1,056,492  | 0.188 | -0.013 | 6.9E-01 | 6.4E-02 |
| 19          | 19:1059004  | 1,059,004  | 0.446 | -0.024 | 3.7E-01 | -       |
| 19          | 19:1064193  | 1,064,193  | 0.241 | -0.015 | 6.2E-01 | -       |
| 19          | 19:1065018  | 1,065,018  | 0.241 | -0.008 | 7.9E-01 | -       |
| 19          | 19:1065044  | 1,065,044  | 0.318 | 0.026  | 3.3E-01 | -       |
| <i>CD33</i> |             |            |       |        |         |         |
| 19          | 19:51728477 | 51,728,477 | 0.268 | -0.039 | 2.0E-01 | -       |
| 19          | 19:51728641 | 51,728,641 | 0.491 | 0.022  | 4.3E-01 | -       |
| 19          | 19:51738917 | 51,738,917 | 0.17  | -0.045 | 2.2E-01 | -       |

MAF= Minor Allele Frequency in the sample;  $\beta$ = effect size not adjusted for *APOE*; P<sup>§</sup>= P-value from Naj et al, 2014; P\* = P-value of the single marker test not adjusted for *APOE*. SNPs with P\* < 0.05 are marked in bold.

**Table S3: Burden test results for genes discussed in Naj et al, 2014.**

| Chr | Gene          | Start       | End         | P <sup>b</sup> | V0.05 | V0.5 |
|-----|---------------|-------------|-------------|----------------|-------|------|
| 1   | <i>CR1</i>    | 207,669,492 | 207,813,992 | nt             | 1     | 7    |
| 2   | <i>BIN1</i>   | 127,805,603 | 127,864,931 | 0.239          | 2     | 2    |
| 6   | <i>CD2AP</i>  | 47,445,525  | 47,594,999  | nt             | 0     | 3    |
| 7   | <i>EPHA1</i>  | 143,087,382 | 143,105,985 | 0.405          | 2     | 5    |
| 8   | <i>CLU</i>    | 27,454,434  | 27,472,548  | nt             | 0     | 1    |
| 11  | <i>MS4A4A</i> | 60,048,014  | 60,076,445  | nt             | 0     | 2    |
| 11  | <i>PICALM</i> | 85,668,727  | 85,780,924  | nt             | 0     | 1    |
| 19  | <i>ABCA7</i>  | 1,040,102   | 1,065,571   | 0.91           | 10    | 15   |
| 19  | <i>CD33</i>   | 51,728,320  | 51,743,274  | nt             | 0     | 3    |

P<sup>b</sup>= P-value of burden test not adjusted for *APOE*; V0.05= Number of SNPs with MAF<0.05; V0.5= Number of all SNPs in a tested gene; nt=Not tested

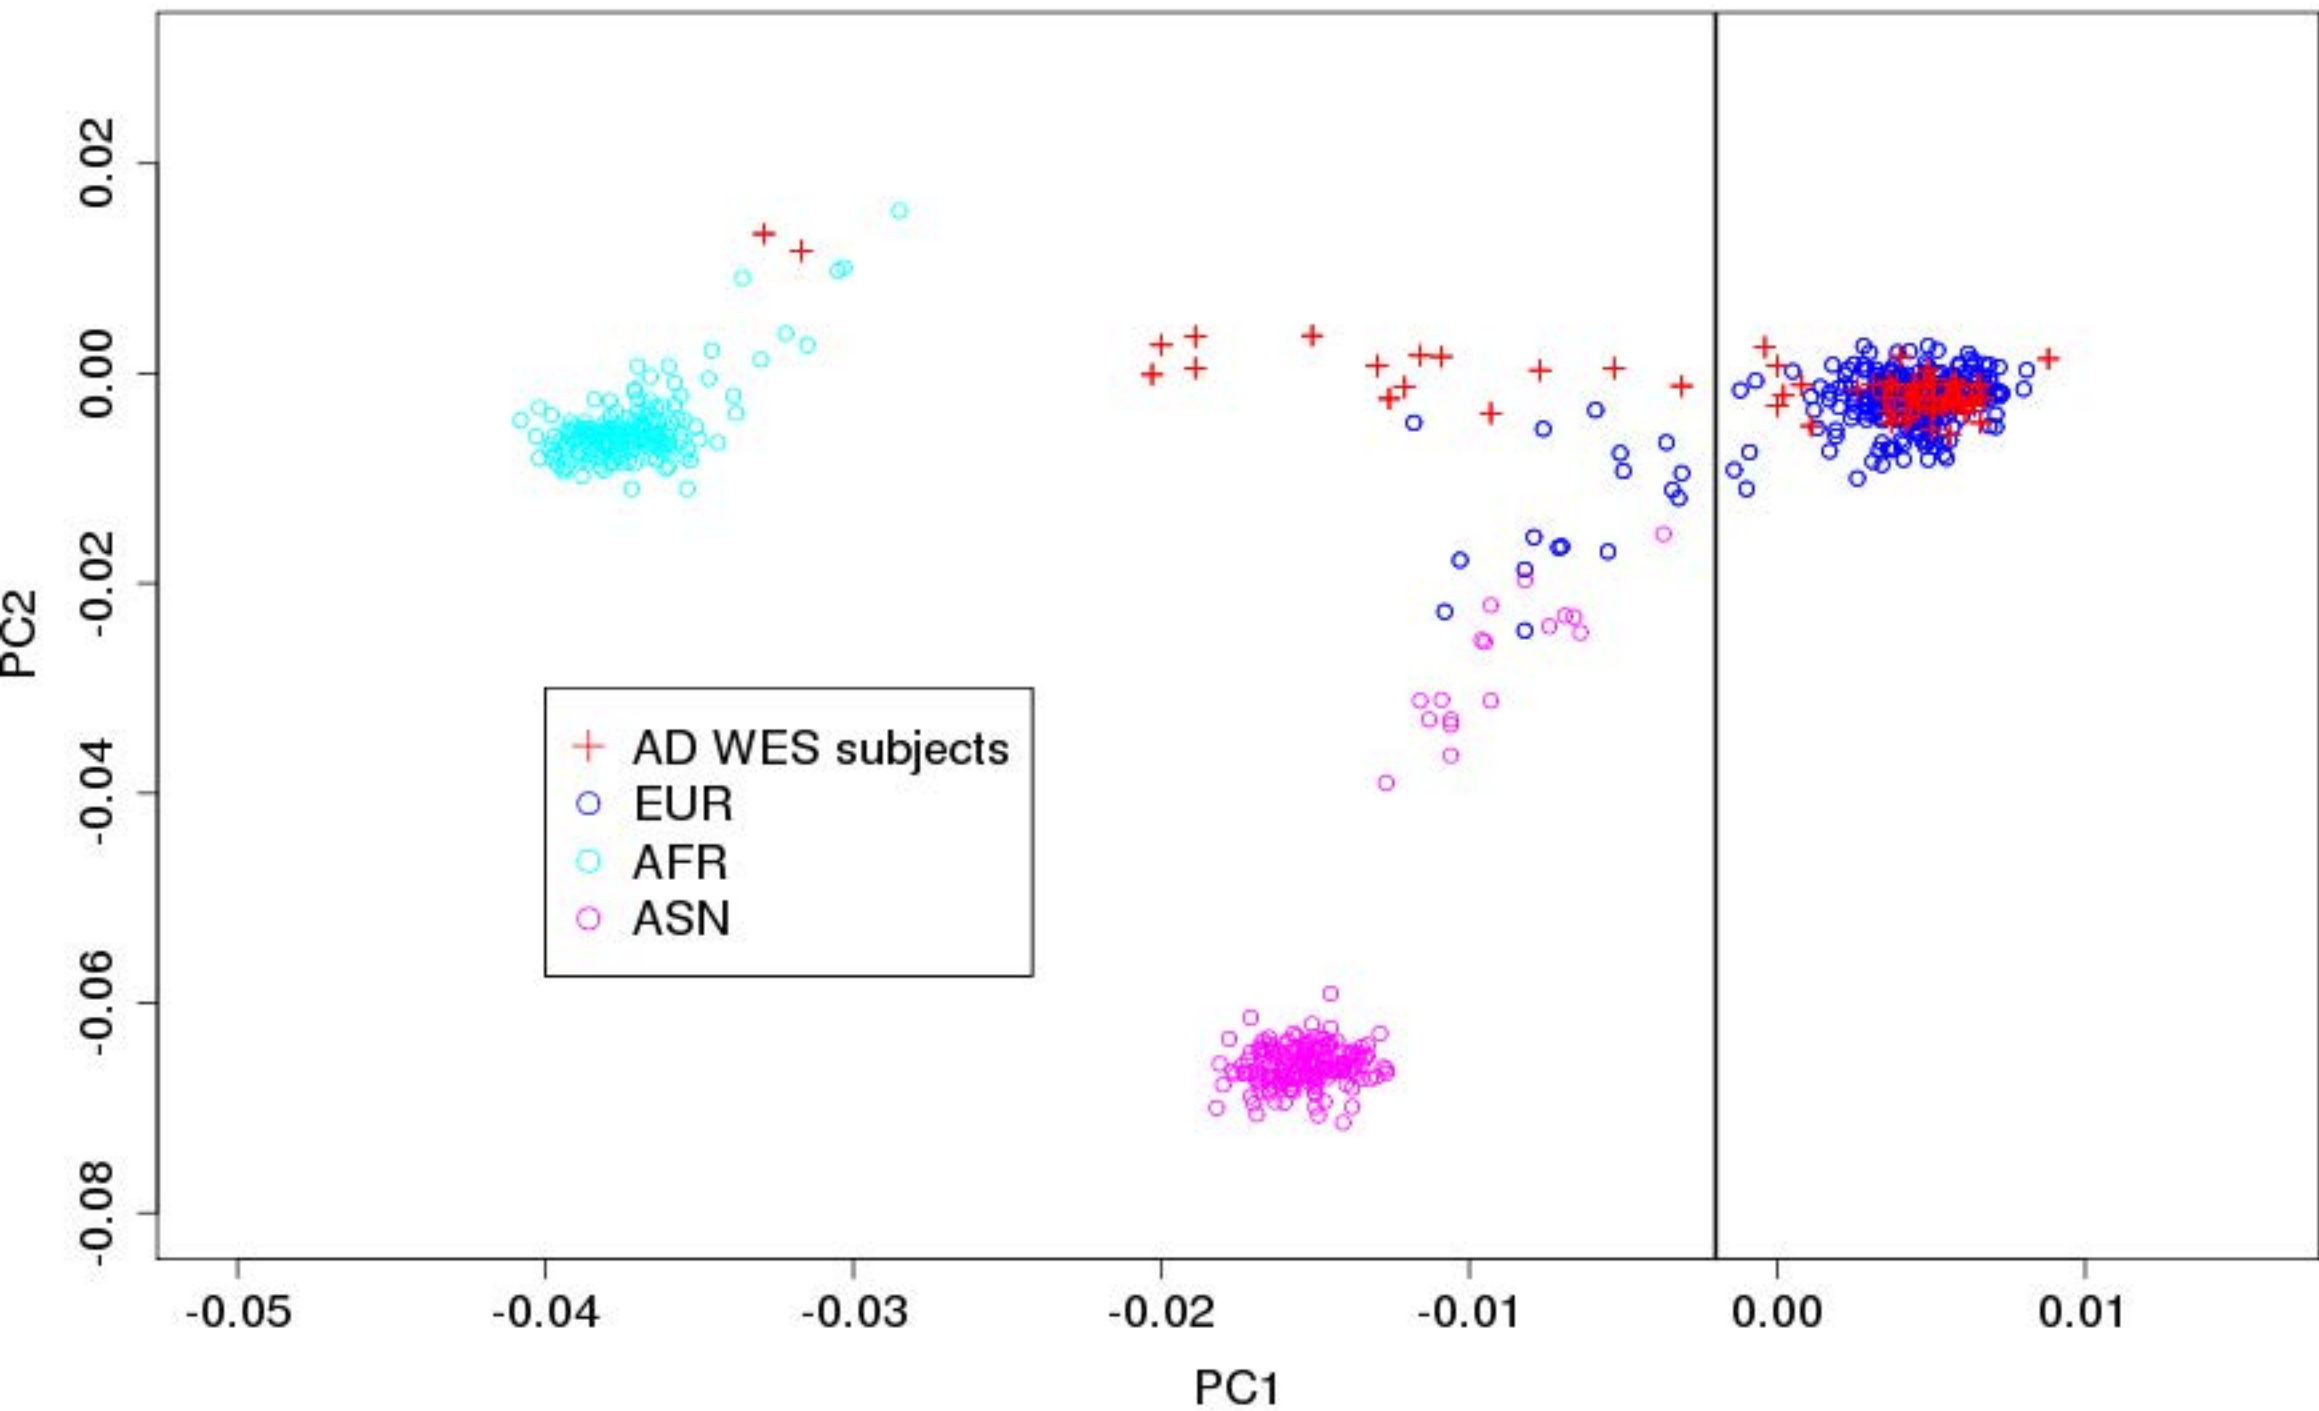

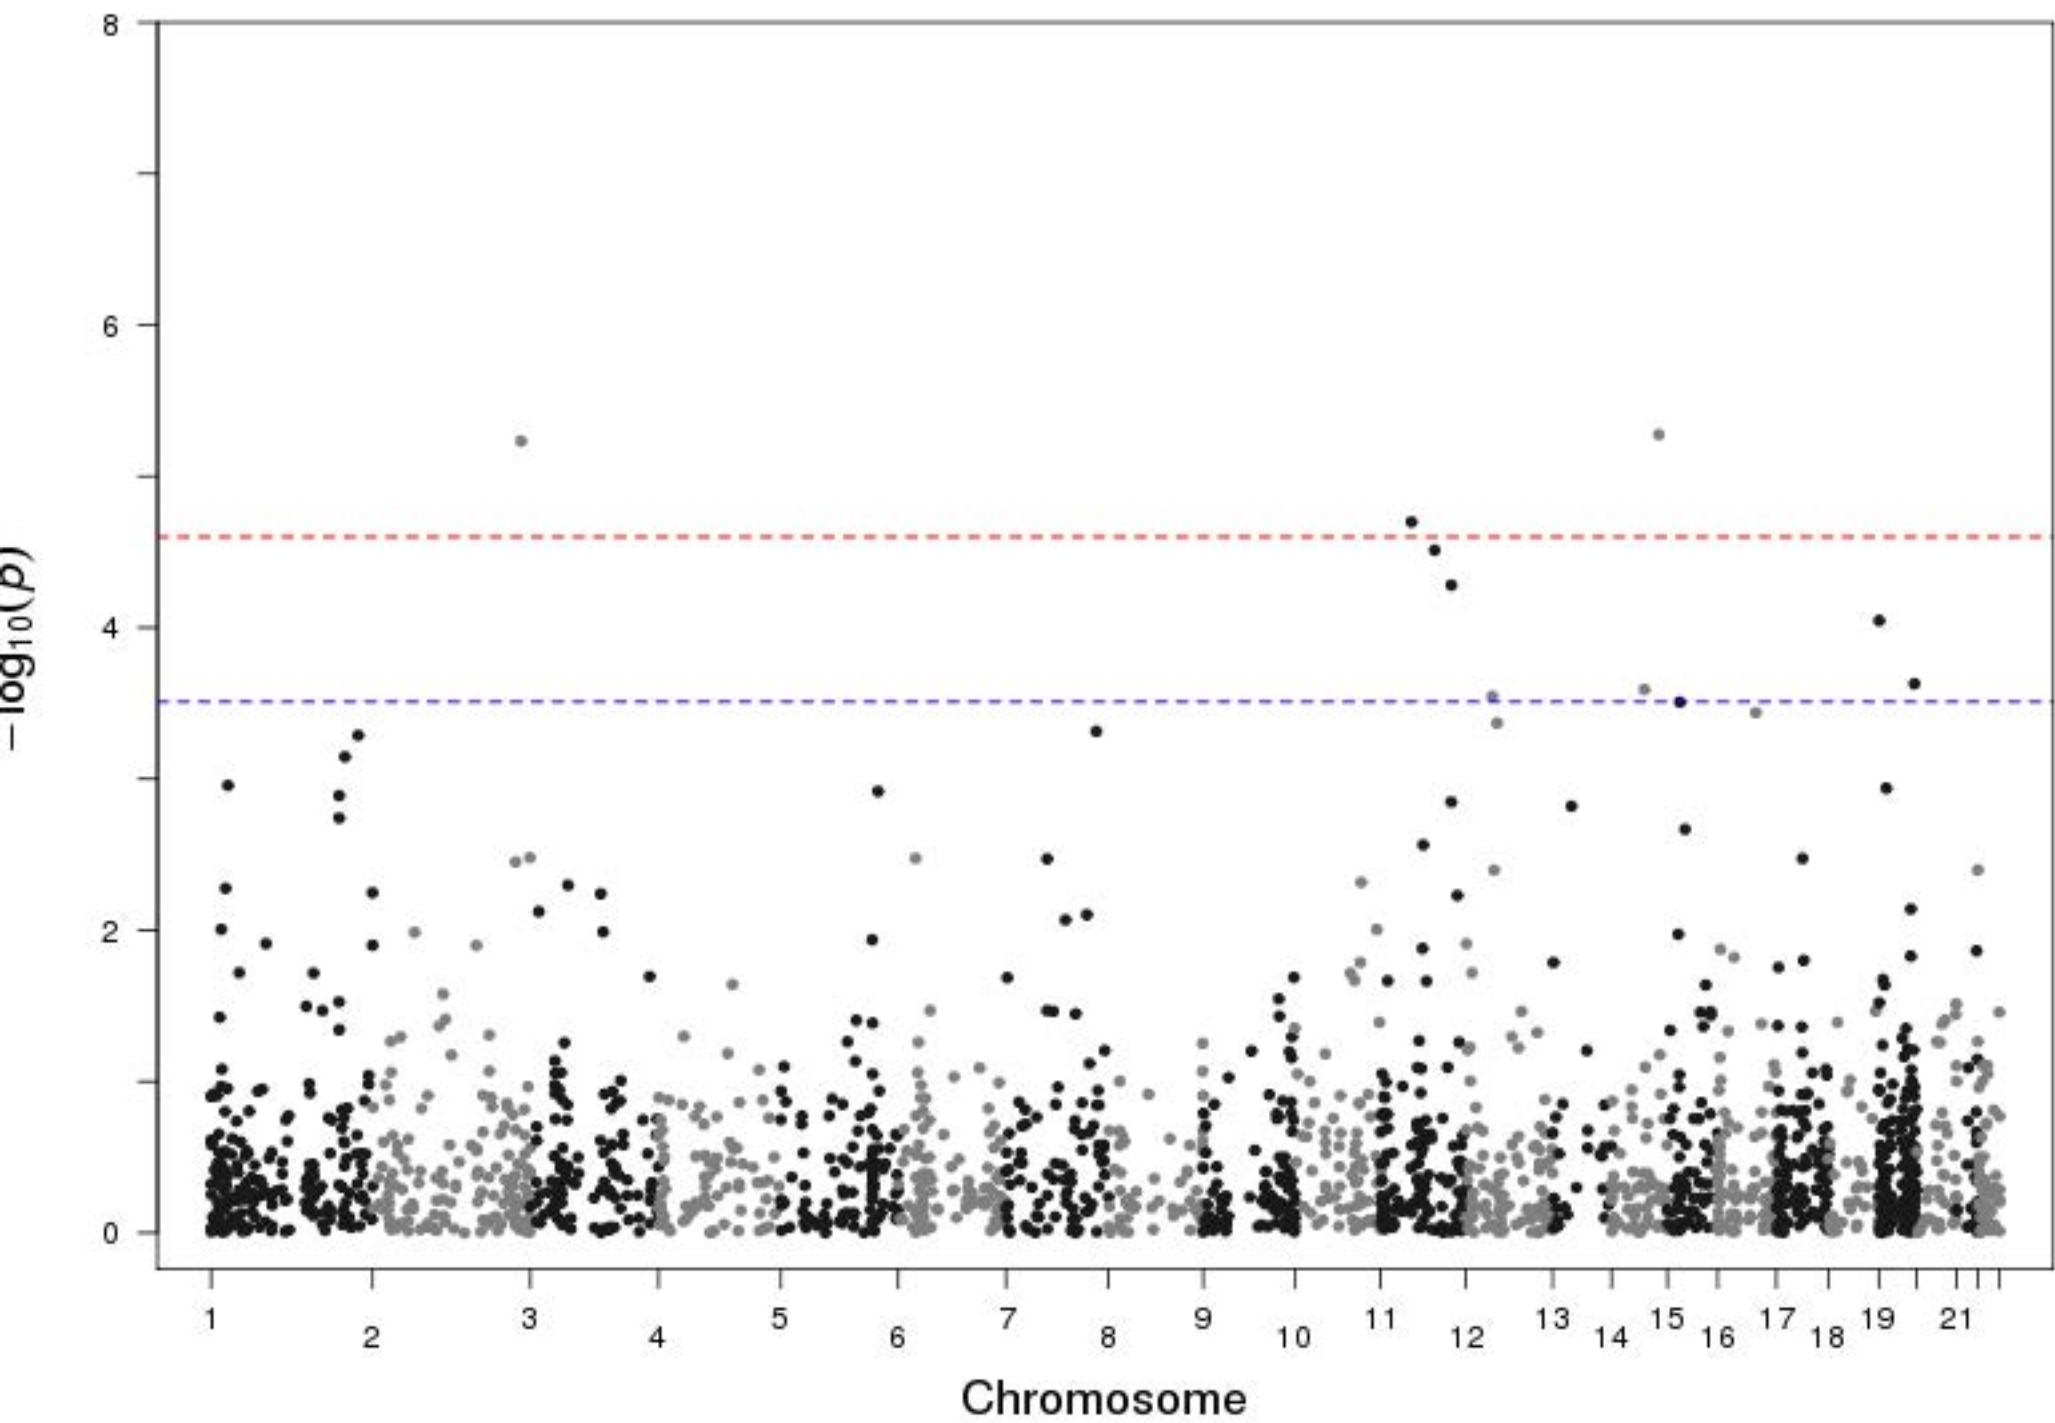

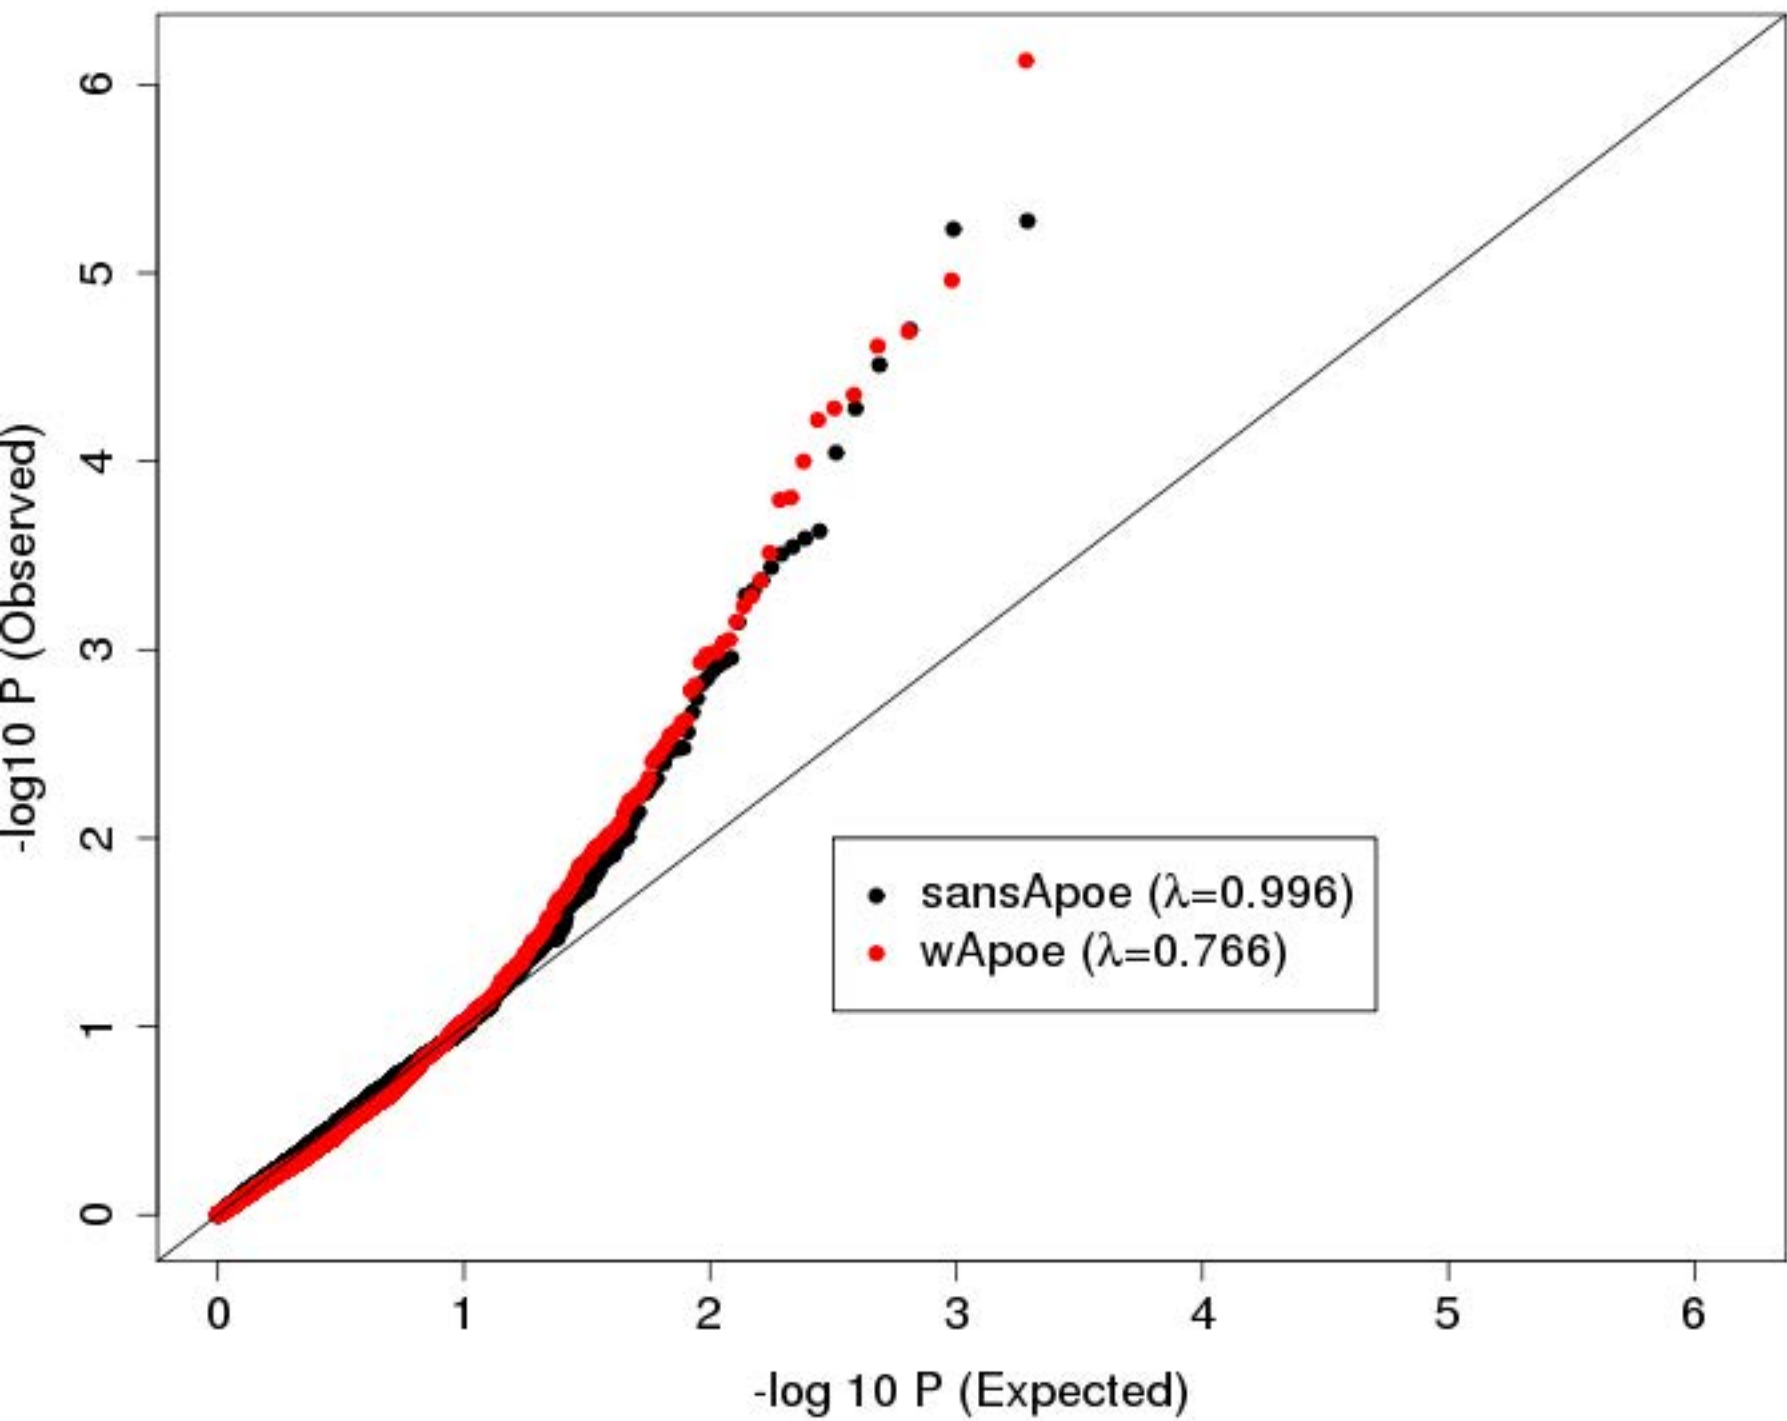

Supplement: NIHMS718399-supplement-Supp_TableS1-S3___FigureS1-S3.pdf [file NIHMS718399-supplement-Supp_TableS1-S3___FigureS1-S3.pdf]
